# Supplementary material
Source: Springer Nature journal article supplement (https://www.springermedizin.de/resource/supplementary/12916_2011_499_MOESM2_ESM.pdf/9599790)
Supplement: MOESM2 [file 9599790]

| <b>Alvarado score</b>                       |              |
|---------------------------------------------|--------------|
| <b>Feature</b>                              | <b>Score</b> |
| Migration of pain                           | 1            |
| Anorexia                                    | 1            |
| Nausea                                      | 1            |
| Tenderness in right lower quadrant          | 2            |
| Rebound pain                                | 1            |
| Elevated temperature                        | 1            |
| Leucocytosis                                | 2            |
| Shift of white blood cell count to the left | 1            |
| <b>Total</b>                                | <b>10</b>    |

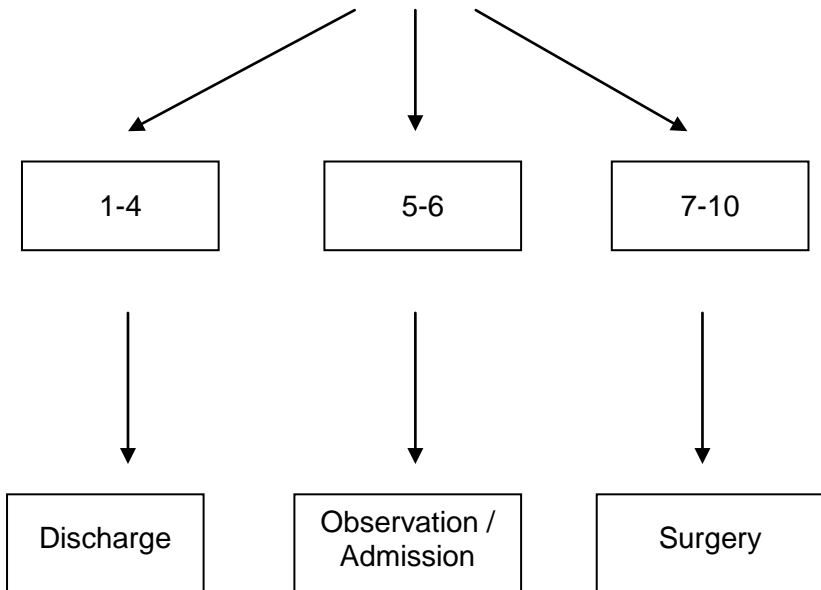

Predicted number of patients with appendicitis:

- Alvarado score 1-4 - 30%
- Alvarado score 5-6 - 66%
- Alvarado score 7-10 - 93%
